# Supplementary material for: Global dietary quality, undernutrition and non-communicable disease: a longitudinal modelling study
Source: HighWire-hosted journal article supplement (doi:10.1136/bmjopen-2015-009331), 2016-01-01

Figure S1 Mean prevalence of stunting 1985-2009

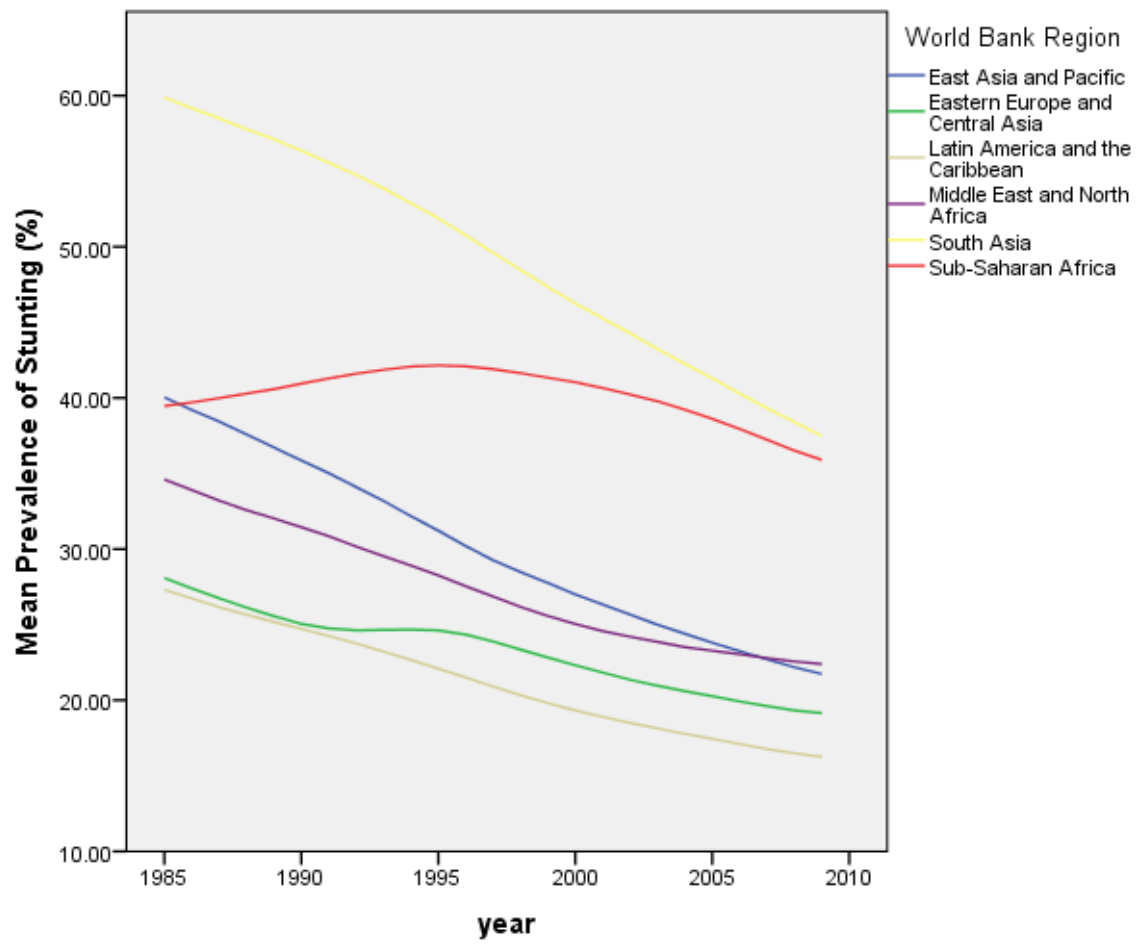

Figure S2 Mean mortality from ischaemic heart disease among people aged 55+ 1980-2009

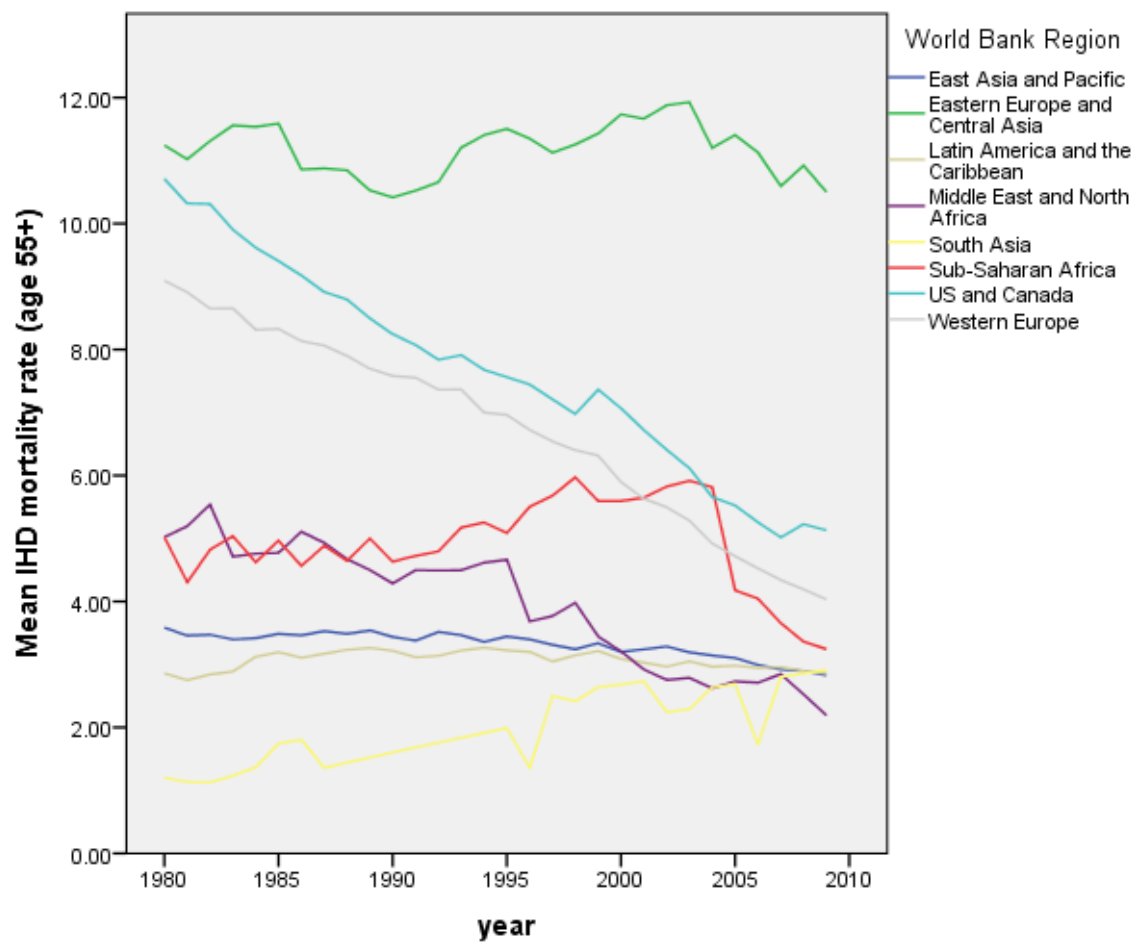

Supplement: bmjopen-2015-009331supp.pdf [file bmjopen-2015-009331supp.pdf]
